# Supplementary material for: Polymerase chain reaction ribotyping of Clostridium difficileisolates in Qatar: a hospital-based study
Source: PubMed Central journal article supplement (PMC4262129; doi:10.1186/1471-2334-14-502), 2014-09-15

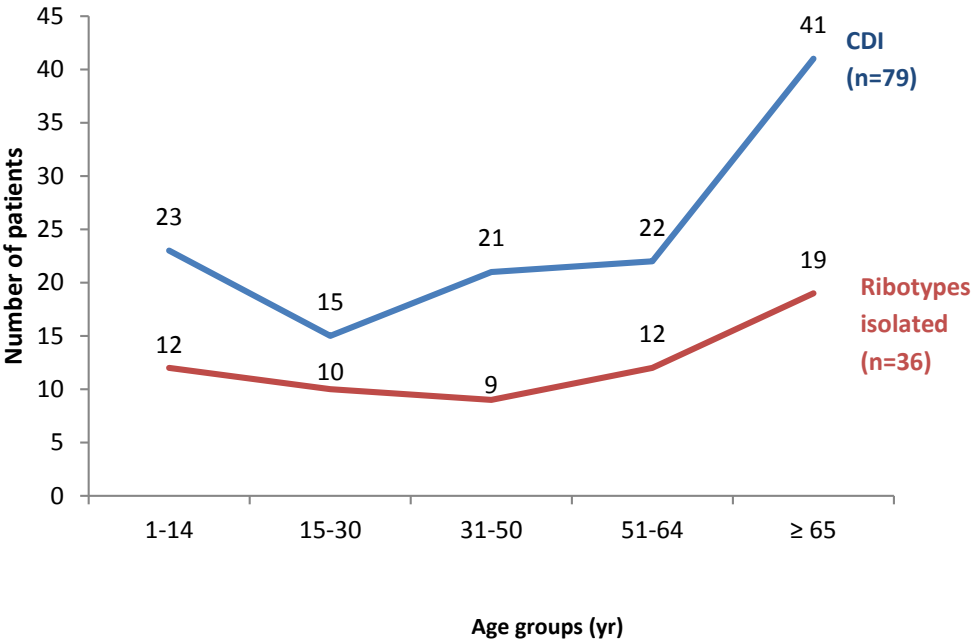

Supplement: 12879_2014_4049_MOESM1_ESM.pdf [file 12879_2014_4049_MOESM1_ESM.pdf]
